Control of breathing and respiratory gas exchange in ducks native to high altitude in the Andes

Catherine M. Ivy<sup>1\*</sup>, Sabine L. Lague<sup>2</sup>, Julia M. York<sup>2,3</sup>, Beverly A. Chua<sup>2</sup>, Luis Alza<sup>4,5,6</sup>,  
Rebecca Cheek<sup>6</sup>, Neal J. Dawson<sup>1</sup>, Peter B. Frappell<sup>7</sup>, Kevin G. McCracken<sup>4,5,6,8</sup>, William K.  
Milsom<sup>2</sup>, and Graham R. Scott<sup>1</sup>

<sup>1</sup>Department of Biology, McMaster University, ON, Canada

<sup>2</sup>Department of Zoology, University of British Columbia, BC, Canada

<sup>3</sup>Department of Integrative Biology, University of Texas at Austin, TX, USA

<sup>4</sup>Department of Biology and Department of Marine Biology and Ecology, Rosenstiel School of Marine and Atmospheric Sciences, University of Miami, FL, USA

<sup>5</sup>Division of Ornithology, Centro de Ornitología y Biodiversidad, Peru

<sup>6</sup>Institute of Arctic Biology and University of Alaska Museum, University of Alaska Fairbanks, AK, USA

<sup>7</sup>Institute for Marine and Antarctic Studies, University of Tasmania, Tasmania, Australia

<sup>8</sup>Human Genetics and Genomics, University of Miller School of Medicine, Miami, Florida, 33136

\* Corresponding author:

Catherine M. Ivy

ivycm@mcmaster.ca

**Key words:** high-altitude adaptation, hypoxic ventilatory response, ventilatory acclimatization to hypoxia, haemoglobin, waterfowl

**Summary Statement:** Distinct physiological strategies for coping with hypoxia exist across different high-altitude lineages of ducks

## ABSTRACT

We examined the control of breathing and respiratory gas exchange in six species of high-altitude ducks that independently colonized the high Andes. We compared ducks from high-altitude populations in Peru (Lake Titicaca at ~3800 m above sea level; Chancay River at ~3000-4100 m) to closely related populations or species from low altitude. Hypoxic ventilatory responses were measured shortly after capture at the native altitude. In general, ducks responded to acute hypoxia with robust increases in total ventilation and pulmonary O<sub>2</sub> extraction. O<sub>2</sub> consumption rates were maintained or increased slightly in acute hypoxia, despite ~1-2°C reductions in body temperature in most species. Two high-altitude taxa – yellow-billed pintail and torrent duck – exhibited higher total ventilation than their low-altitude counterparts, and yellow-billed pintail exhibited greater increases in pulmonary O<sub>2</sub> extraction in severe hypoxia. In contrast, three other high-altitude taxa – ruddy duck, cinnamon teal, speckled teal – had similar or slightly reduced total ventilation and pulmonary O<sub>2</sub> extraction than low-altitude relatives. Arterial O<sub>2</sub> saturation (SaO<sub>2</sub>) was elevated in yellow-billed pintails at moderate levels of hypoxia, but there were no differences in SaO<sub>2</sub> in other high-altitude taxa compared to their close relatives. This finding suggests that improvements in SaO<sub>2</sub> in hypoxia can require increases in both breathing and haemoglobin-O<sub>2</sub> affinity, because yellow-billed pintail was the only high-altitude duck with concurrent increases in both traits compared to its low-altitude relative. Overall, our results suggest that distinct physiological strategies for coping with hypoxia can exist across different high-altitude lineages, even among those inhabiting very similar high-altitude habitats.

## INTRODUCTION

The air at high altitude is both cold and hypoxic. These conditions challenge the ability of birds and mammals to adequately match O<sub>2</sub> supply and O<sub>2</sub> demand, because cold increases the demand for O<sub>2</sub> while hypoxia restricts O<sub>2</sub> availability (Monge and Leon-Velarde, 1991; Storz et al., 2010). The first step in obtaining O<sub>2</sub> is pulmonary ventilation, and thus the hypoxic ventilatory response (HVR) is critical for O<sub>2</sub> uptake in the thin air at high altitude (Birchard and Tenney, 1986; Brutsaert, 2007).

Ventilation is modulated by changes in blood gas levels and metabolism. Acute exposure to hypoxia leads to a drop in arterial partial pressure of O<sub>2</sub> (PaO<sub>2</sub>), which stimulates an increase in ventilation (the HVR) that helps offset the fall in PaO<sub>2</sub> (Powell et al., 1998). This reflex is initiated primarily by the carotid bodies, peripheral chemoreceptors that are sensitive to changes in arterial PO<sub>2</sub> and PCO<sub>2</sub>/pH located in the carotid arteries supplying the brain in mammals and birds (Gonzalez et al., 1994). Prolonged exposure (days to weeks) to hypoxia leads to further increases in breathing by increasing the ventilatory sensitivity to hypoxia through the process of ventilatory acclimatization to hypoxia (VAH) (Powell et al., 1998). Ventilation is also modulated by changes in metabolism, which helps match O<sub>2</sub> supply to tissue O<sub>2</sub> demand during exercise, thermogenesis, metabolic depression, or changes in body temperature (Barros et al., 2006; Chappell, 1992; Eldridge, 1994).

Birds and mammals that live at high altitude have been shown to differ from low-altitude taxa in their ventilatory responses to hypoxia. Some species/populations native to high-altitude in the Himalayas and on the Tibetan Plateau, such as bar-headed geese (*Anser indicus*), plateau pika (*Ochotona curzoniae*), and Tibetan people, breathe more and exhibit HVRs that are equivalent or greater in magnitude than species/populations native to low altitude (Beall et al., 1997; Brutsaert, 2007; Lague et al., 2016; Moore, 2000; Pichon et al., 2009; Scott and Milsom, 2007). In contrast, in some high-altitude residents in the Andes, such as Andean goose (*Chloephaga melanoptera*), guinea pigs (*Cavia porcellus*), and Andean people, breathing and the ventilatory response to hypoxia are reduced compared to their low-altitude counterparts (Beall, 2000; Brutsaert et al., 2005; Ivy et al., 2018; Lague et al., 2017; Schwenke et al., 2007). It has been difficult to determine whether these patterns of variation result from evolved differences or from environmentally-induced plasticity (acclimatization, developmental plasticity, etc.) (Brutsaert, 2016; Laguë, 2017; Moore, 2017). Nevertheless, these intriguing results suggest that there may

be convergent mechanisms for coping with hypoxia at high altitude within a given geographic region, but divergent mechanisms between species inhabiting different geographic regions. These findings, however, arise from a small number of very different species, native to different habitats, with different lifestyles, activity levels, and respiratory physiologies. It thus remains unclear whether convergent and/or divergent responses will also be observed in similar closely-related species that independently colonized high altitude in one geographic region.

The objective of this study was to investigate whether the hypoxic ventilatory response has been altered across multiple duck species from the high Andes of Peru, and if so, whether there are similar or distinct changes in each high-altitude species. Waterfowl (Order Anseriformes) native to the Andes are a powerful taxonomic group for examining the general patterns of variation across high-altitude taxa, because many species have independently colonized similar aquatic habitats at high altitude (McCracken et al., 2009a; Natarajan et al., 2015). Previous studies of haemoglobin evolution in Andean waterfowl showed that genetically-based increases in haemoglobin-O<sub>2</sub> binding affinity have arisen in most high-altitude waterfowl examined to date (McCracken et al., 2009a; Natarajan et al., 2015), but other aspects of respiratory physiology have not been comprehensively examined in this group. Here, we examine the HVR of six species of ducks in their native high-altitude environment in the Andes, five of which were compared to a closely related population of the same species or to a sister species in their native environment at low altitude.

## **MATERIALS AND METHODS**

### **Animals**

Ducks were captured and studied in July and August of 2014 and 2015. Five species were captured and tested at high altitude (3812 m above sea level) at the Lake Titicaca National Reserve (Puno, Peru) in August 2014: speckled teal (*Anas flavirostris oxyptera*; n = 12, 4 males and 8 females), Andean ruddy duck (*Oxyura jamaicensis ferruginea*; n = 12, 5 males and 7 females), yellow-billed pintail (*A. georgica*; n = 13, 10 males and 3 females), cinnamon teal (*A. cyanoptera orinomus*; n = 12, 8 males and 4 females), and puna teal (*A. puna*; n = 12, 7 males and 5 females; body mass of  $404 \pm 11$  g). Four species, representing closely related populations of the same species or sister species of four of these high-altitude taxa, were captured at low altitude in Oregon, USA (at either Summer Lake Wildlife Management Area at 1260 m or

Malheur National Wildlife Refuge at 1256 m) in July 2015, and were tested at Summer Lake: green-winged teal (*A. crecca*; n = 10, 5 males and 5 females), ruddy duck (*O. j. jamaicensis*; n = 8, 4 males and 4 females), northern pintail (*A. acuta*; n = 10, 7 males and 3 females), and cinnamon teal (*A. cyanoptera septentrionalium*; n = 11, 6 males and 5 females). Torrent ducks (*Merganetta armata*) were also captured and tested in August 2015, both at high altitude (3000-4086 m above sea level; n = 8, all males) on the Chancay River Valley near Vichaycocha, Lima, Perú, and at low altitudes (1092-1665 m above sea level; n = 14, all males) on the Chillón River in Santa Rosa de Quives, Lima, Perú. Ducks were allowed to recover overnight from capture for at least 6-12 h, with unlimited access to water, before responses to acute hypoxia were measured. During this time, birds were held in large animal kennels with dry bedding. All experiments were performed within 2 days of capture, and birds were tube fed commercial duck chow if held for longer than 1 day in captivity, but food was always withheld for 6-12 h before measurements took place. Ducks were collected in accordance with permits issued by the Ministerio del Ambiente del Peru (004-2014-SERNANP-DGANP-RNT/J), Ministerio de Agricultura del Peru (RD 169-2014-MIN AGRI-DGFFS/DGEFFS and 190-2015-SERFOR/ DGGSPFFS), U.S. Fish and Wildlife Service Region 1 Migratory Bird Permit Office MB68890B-0 (MB68890B-0), and Oregon Department of Fish and Wildlife (Scientific Taking Permit 101-15). All experimental procedures followed guidelines established by the Canadian Council on Animal Care, and were approved by institutional animal care committees.

### **Acute hypoxia responses**

We measured the respiratory and metabolic responses to acute hypoxia using plethysmography and respirometry techniques similar to those used previously for Andean goose (Ivy et al., 2018; Lague et al., 2017). Ducks were held in a cradle that permitted unrestricted breathing, with their head in a 4 l opaque chamber that was sealed around the neck with a latex collar. Ducks were given 60-90 min to adjust to the apparatus (when they exhibited a noticeably relaxed and stable breathing pattern) before measurements began, with ambient air supplied to the head chamber at a flow rate of 5 l min<sup>-1</sup> (volume in standard temperature and pressure of dry air, STPD). Measurements of breathing and metabolism were then recorded at several inspired O<sub>2</sub> tensions (PO<sub>2</sub>), starting in ambient conditions (18 and 13 kPa at low and high altitude, respectively) and then during step-wise decreases in PO<sub>2</sub>, for 25 min at each of the following

steps: 18 (low-altitude ducks only), 13, 12, 9, 7, and 6 kPa. Dry incurrent air and nitrogen were mixed using pre-calibrated rotameters (Matheson Model 7400 Gas Mixer, E700 and E500 flowtubes, Oakville, ON, Canada) to achieve each level of hypoxia.

Metabolism, breathing, arterial O<sub>2</sub> saturation, and body temperature were measured continuously during the above exposures, and we report the average values across the last 10 min at each inspired PO<sub>2</sub>. The excurrent air leaving the head chamber was subsampled at 200 ml min<sup>-1</sup>, dried with silica gel (MLA6024, ADInstruments, Colorado Springs, CO, USA), and passed through CO<sub>2</sub> and O<sub>2</sub> analyzers (FOXBOX, Sable Systems, Las Vegas, NV, USA). These data, together with the flow of air through the head chamber, were used to calculate rates of O<sub>2</sub> consumption ( $\dot{V}O_2$ ), as described by Lighton (2008), which we express here in volume units at STPD. Tidal volume ( $V_T$ ) and breathing frequency ( $f_R$ ) were determined from the flow oscillations of the biased outflow from the head chamber, measured using a pneumotachograph (8311A series, Hans Rudolph Inc, Shawnee, KS, USA) and differential pressure transducer (Validyne DP45, Cancoppas, Mississauga, ON, Canada) zeroed to baseline flow through the chamber. Body temperature ( $T_b$ ) was measured continuously using a rectal probe (RET-1, Physitemp, New Jersey, USA). All of the above data were acquired using a PowerLab 16/32 and Labchart 8 Pro software (ADInstruments). Total ventilation ( $\dot{V}_E$ ) was determined as the product of  $f_R$  and  $V_T$ . Both  $V_T$  and  $\dot{V}_E$  are reported in volumes expressed at body temperature and pressure of water-saturated air (BTPS), which best reflects the air volumes moved by the animal. Air convection requirement (ACR) was calculated as the quotient of  $\dot{V}_E$  and  $\dot{V}O_2$ . Pulmonary O<sub>2</sub> extraction (%) was calculated as  $\dot{V}O_2$  divided by the product of  $\dot{V}_E$  and the concentration of O<sub>2</sub> in inspired air (i.e., ml O<sub>2</sub> in STPD per ml air in BTPS). Arterial O<sub>2</sub> saturation (SaO<sub>2</sub>) was measured using the MouseOx Plus pulse oximetry system and software (Starr Life Sciences, PA, USA) with neck collar sensors, which was enabled by plucking a small number of feathers from around the neck. We have previously demonstrated that the MouseOx Plus system is able to provide accurate measurements of SaO<sub>2</sub> in waterfowl (Ivy et al., 2018). Arterial O<sub>2</sub> saturation was measured in all low-altitude ducks and all torrent ducks, but in only a subset of high-altitude ducks (speckled teal: n = 6; Andean ruddy duck: n = 5; yellow-billed pintail: n = 6; cinnamon teal: n = 5).

## Statistics

Two-factor ANOVA was generally used for most comparisons to examine the main effects and interactions of population/species altitude and acute inspired  $PO_2$  (repeated measure) within each independent pair of closely related high-altitude and low-altitude populations/species, and we used Holm-Sidak post-tests to test for pairwise differences between populations/species within each inspired  $PO_2$ . However, for puna teal, a species for which we do not have data for a close low-altitude relative, we used one-factor ANOVA to examine the main effect of inspired  $PO_2$ . For body mass data, we used two-factor ANOVA and Holm-Sidak post-tests to test for the main effect of altitude and the pairwise differences between high- and low-altitude pairs. Values are reported as mean  $\pm$  S.E.M. All statistical analysis was conducted with SigmaStat software (v. 3.5) with a significance level of  $P < 0.05$ .

## RESULTS

Breathing and the hypoxic ventilatory response were elevated in some high-altitude ducks compared to their close relatives from low altitude (Fig. 2, Table 1). All ducks increased  $\dot{V}_E$  by up to ~36-174% in response to acute hypoxia challenge (Fig. 2A), as reflected by significant main effects of inspired  $PO_2$  for all high-low pairs in two-factor ANOVAs (Table 1). Two high-altitude taxa, torrent duck and yellow-billed pintail, exhibited higher  $\dot{V}_E$  than their low-altitude counterparts across a range of inspired  $PO_2$  (Fig. 2A), and there was a population main effect or population $\times$  $PO_2$  interaction for these species (Table 1). The remaining high-altitude taxa – Andean ruddy duck, cinnamon teal, and speckled teal – had similar or slightly reduced  $\dot{V}_E$  when compared to closely related low-altitude taxa (Fig. 2A, Table 1). Increases in  $f_R$  (~17-170%) were the main contributor to increases in  $\dot{V}_E$  in response to reductions in inspired  $PO_2$  in nearly all species (Fig. 2B), with only modest changes in  $V_T$  (~4-50%) in some species (Fig. 2C, Table 1). The exception to this pattern was the puna teal, the only species for which we do not have data for a close lowland relative; this species increased  $\dot{V}_E$  in acute hypoxia primarily by increasing  $V_T$  (Table 2). However,  $f_R$  was similar or lower in high-altitude ducks than in low-altitude ducks for all high-low comparisons (Fig. 2B, Table 1). High-altitude torrent ducks and yellow-billed pintails breathed with deeper  $V_T$  than their lowland counterparts across a range of inspired  $PO_2$ , which was the dominant contributor to the increases in  $\dot{V}_E$  in these high-

altitude taxa (Fig. 2C). However, this was not the case in high-altitude ruddy duck, cinnamon teal, or speckled teal, which had similar  $V_T$  to their low-altitude counterparts (Fig. 2C, Table 1).

Metabolic rates (as reflected by  $\dot{V}O_2$ ) were stable or increased under hypoxic conditions across species (Fig. 3A, Table 1).  $\dot{V}O_2$  was largely similar between high and low altitude, with the exception that high-altitude yellow-billed pintail had higher  $\dot{V}O_2$  than closely related low-altitude northern pintail. This was reflected by a main effect of population in two-factor ANOVA (Table 1) and the differences were particularly evident as hypoxia became more severe (Fig. 3A). Increases in both  $\dot{V}_E$  and pulmonary  $O_2$  extraction with deepening hypoxia likely helped avoid any falls in  $\dot{V}O_2$  across species. This was reflected by main effects of inspired  $PO_2$  on ACR (Fig. 3B) and pulmonary  $O_2$  extraction (Fig. 3C) for nearly all high-low pairs (Table 1). The increases in ACR during hypoxia were similar in high-altitude ruddy duck, cinnamon teal, and speckled teal when compared to their close low-altitude relatives, and there were no main effects of population on this variable. However, ACR was lower in the deepest levels of hypoxia (but not at the intermediate levels) in the other two high-altitude taxa, torrent duck and yellow-billed pintail, when compared to their close lowland relatives, and there were significant population $\times$  $PO_2$  interactions for these high-low comparisons (Table 1) High-altitude yellow-billed pintail appeared to counterbalance this decline in ACR in the most severe levels of hypoxia with an increase in pulmonary  $O_2$  extraction compared to low-altitude northern pintails (Fig. 3C, Table 1).

$T_b$  declined by up to  $\sim 1\text{-}2^\circ\text{C}$  in response to acute hypoxia in most duck species (Fig. 4), as previously observed in many other birds (Kilgore et al., 2008; Novoa et al., 1991; Scott et al., 2008). The exception to this pattern were the two diving ducks from low altitude – torrent duck and ruddy duck – but these low-altitude populations differed from their conspecific high-altitude populations, which did exhibit a reduction in  $T_b$  in hypoxia (Fig. 4, Table 1). The variation in  $T_b$  did not appear to be clearly associated with any comparable variation in  $\dot{V}O_2$  (Fig. 3A).

There were surprisingly few differences in  $SaO_2$  in hypoxia between high-altitude and low-altitude ducks. As expected,  $SaO_2$  decreased progressively with increasing severity of acute hypoxia, and the main effect of inspired  $PO_2$  was seen across species (Fig. 5, Table 1). However, yellow-billed pintail was the only high-altitude duck that had a higher  $SaO_2$  than their low-altitude counterpart, which was reflected by higher saturations than low-altitude northern pintails at levels of moderate hypoxia that are environmentally realistic in the high Andes (Fig. 5, Table



1). SaO<sub>2</sub> was similar between high- and low-altitude taxa for all other high-low comparisons. These data suggest that the differences in SaO<sub>2</sub> between the high- and low-altitude yellow-billed pintails may be a product of differences in both breathing and haemoglobin-O<sub>2</sub> affinity, as will be examined in more detail in the Discussion.

Body mass often differed between high- and low-altitude taxa (Fig. 6). There was variation between species pairs, with teals tending to be smaller than ruddy ducks and pintails. Body mass was greater in high-altitude speckled teal (30%), cinnamon teal (43%), and Andean ruddy duck (62%) compared to their close relatives from low altitude (Fig. 6A). In contrast, yellow-billed pintail was 27% smaller than northern pintail, and torrent duck was of similar body mass between high and low altitudes (Fig. 6A). The variation in body mass across pairs accounted for some of the variation in metabolic rate, particularly when excluding torrent ducks, in which case mass-specific  $\dot{V}O_2$  (measured at a common PO<sub>2</sub> of 13 kPa) was related to body mass ( $M_b$ ) with a scaling exponent of -0.33 (i.e.,  $\dot{V}O_2 \propto M_b^{-0.33}$ ) (Fig. 6B). However, there was no significant relationships between body mass and air convection requirement (data not shown), suggesting that body mass had no effect on breathing that was independent of its effect on metabolic rate.

## DISCUSSION

Previous work has shown that breathing and the hypoxic ventilatory response of high-altitude natives differ from that of their low-altitude counterparts in distinct ways (see Introduction). Here, we show that breathing and pulmonary gas exchange in different lineages of high-altitude ducks can differ in distinct ways from their close relatives from low altitude, even among similar species inhabiting similar high-altitude habitats. Based on these and previous findings, high-altitude ducks differ from those from low altitude in at least two possible ways – (i) increases in  $\dot{V}_E$  and the hypoxic ventilatory response and/or (ii) an increased haemoglobin-O<sub>2</sub> binding affinity (Natarajan et al., 2015). However, only when both occurred together, as in the yellow-billed pintail, did these differences lead to any net benefit in increasing SaO<sub>2</sub>.

### **Increases in the hypoxic ventilatory response exist in some, but not all, high-altitude ducks**

All ducks, from both low and high altitude, responded to acute hypoxia with robust increases in  $\dot{V}_E$  and pulmonary  $O_2$  extraction. The magnitude of these responses appear to be similar to previous studies of other waterfowl species, being somewhat intermediate between bar-headed geese (which exhibit pronounced increases in  $\dot{V}_E$  but only modest increases in extraction in hypoxia) and Andean geese (which exhibit very modest increases in  $\dot{V}_E$  but large increases in pulmonary  $O_2$  extraction in hypoxia) (Scott et al., 2007; Lague et al., 2017). Increases in breathing frequency contributed the majority to increases in  $\dot{V}_E$  in hypoxia, as is typical of many species of bird and mammal, with smaller to negligible increases in tidal volume (Fig. 2) (Scott et al., 2007; Lague et al., 2017). In contrast, puna teal increased  $\dot{V}_E$  primarily by increasing tidal volume in hypoxia (Table 2). This hypoxia response of puna teal may be particularly beneficial for gas exchange, because increases in tidal volume are more effective at increasing parabronchial ventilation than are increases in breathing frequency (the former reduces the ratio of dead space gas in the air ventilating parabronchioles). Puna teal is endemic to high altitude and has likely been established in the high Andes for over one million years (McCracken et al., 2009b), and further examination of high-altitude adaptations in this species may be a fruitful direction for future research.

In comparison to close relatives from low altitude, the increase in  $\dot{V}_E$  was elevated in only two duck taxa native to high altitude – torrent ducks and yellow-billed pintails (Fig. 2). One possible explanation for the differences in these two high-altitude groups is that chronic exposure to hypobaric hypoxia led to plasticity in the underlying neural networks controlling breathing, increasing  $\dot{V}_E$  and enhancing the hypoxic ventilatory response, as has been observed in some (Black and Tenney, 1980; Lague et al., 2016) but not all (Powell et al., 2004) previous studies. A second possible explanation is that increases in  $\dot{V}_E$  and the hypoxic ventilatory response arose from evolutionary adaptation to high altitude, as appears to have occurred in the bar-headed goose (Scott and Milsom, 2007). For this latter possibility to occur, the effects of selection would have to be very strong, because gene flow still occurs between high- and low-altitude populations of most of the species we examined (McCracken et al., 2009a; McCracken et al., 2009c; Natarajan et al., 2015).

The increases in  $\dot{V}_E$  and the hypoxic ventilatory response in the yellow-billed pintail (but not torrent duck) from high altitude could also be a consequence of elevated metabolic rate (Fig. 3). Yellow-billed pintails are ~25% smaller than northern pintails (Fig. 6A), so the allometric effects of body mass on resting metabolic rate could explain some of this difference between species (Fig. 6B) (White et al., 2006), but the more substantial ~2-fold differences in metabolic rate at lower  $PO_2$  cannot be explained by these more subtle effects of allometry. Nevertheless, the observation that yellow-billed pintails from high altitude had higher  $\dot{V}_E$  (Fig. 2) but not higher ACR (Fig. 3) than their relatives from low altitude supports the suggestion that differences in metabolic rate could drive the differences in total ventilation. In fact, ACR was slightly less in this high-altitude taxon during severe hypoxia. Under these conditions, the higher metabolic rates in high-altitude pintails are matched by increases in pulmonary  $O_2$  extraction in severe hypoxia as compared to low-altitude pintails (Fig. 3). This could reflect a high  $O_2$  diffusing capacity in the lungs of high-altitude pintails, as previously observed for Andean geese (Maina et al., 2017).

However, it is also possible that the increases in metabolic rate in yellow-billed pintails from high altitude arise as a consequence of the increases in  $\dot{V}_E$ . Metabolic savings have been suggested as one possible advantage of blunting  $\dot{V}_E$  and the HVR in some other high-altitude taxa, so long as  $O_2$  demands can still be met (Powell, 2007). By a similar rationale, it is possible that increases in  $\dot{V}O_2$  due to respiratory muscle activity could consume any added  $O_2$  taken up into the blood as a result of breathing more in hypoxia. However, we have previously shown that the metabolic cost of breathing is quite low (~1-4% of resting metabolic rate) in all of the species studied here (York et al., 2017). We also found that the dynamic compliance of the respiratory system is greater in high-altitude yellow-billed pintails and in some other high-altitude ducks than in their low-altitude counterparts, such that many high-altitude ducks have higher breathing efficacy and can move a greater volume of air for a given power output of breathing (York et al., 2017).

Three high-altitude taxa – ruddy duck, cinnamon teal, and speckled teal – on the other hand, had similar levels of  $\dot{V}_E$  as their low-altitude relatives (Fig. 2). In all three comparisons between high and low altitude pairs, increases in ACR were similar during progressive hypoxia. Although this lack of variation could reflect a lack of any plasticity or evolved changes in these high-altitude taxa, it could also reflect concurrent but opposing effects of plasticity and evolution on the control of breathing. The latter scenario could reflect counter-gradient variation, a term

that describes situations in which the effects of phenotypic plasticity on a trait are opposed by local adaptation, thus minimizing phenotypic change along an environmental gradient (Conover and Schultz, 1995). Although increases in breathing improve O<sub>2</sub> uptake, they also result in excessive rates of CO<sub>2</sub> excretion and/or respiratory water loss (Powell, 2007). In this case, there could be opposing selective forces at high altitude for enhanced O<sub>2</sub> delivery versus preservation of acid-base homeostasis and/or water balance. This may also explain why some other species of high-altitude waterfowl, such as the Andean goose and crested duck, have evolved a blunted hypoxic ventilatory response (Ivy et al., 2018; Lague et al., 2017).

### **Increases in haemoglobin-O<sub>2</sub> affinity have evolved in some, but not all, high-altitude ducks**

Some of the high-altitude duck species studied here have evolved an increased haemoglobin-O<sub>2</sub> binding affinity compared to their close relatives from low altitude (McCracken et al., 2009a; Natarajan et al., 2015). Birds co-express two major haemoglobin isoforms – HbA and HbD – that express different  $\alpha$ -chain subunits, encoded by two distinct  $\alpha$ -globin genes (Storz, 2016a). HbA is the major isoform, comprising ~70-80% of all blood Hb, and this isoform has a higher affinity (lower P<sub>50</sub>, the PO<sub>2</sub> at 50% saturation) in high-altitude yellow-billed pintail, cinnamon teal, speckled teal, and puna teal when measured in the presence of physiologically relevant concentrations of allosteric modifiers (Natarajan et al., 2015). In contrast, Hb-O<sub>2</sub> affinity is very similar in high-altitude torrent duck and ruddy duck as compared to their low-altitude relatives. However, the Hb-O<sub>2</sub> affinity of the low-altitude populations of each of these two diving species is already characteristic of the high-altitude populations, not low-altitude populations, of non-diving species (Natarajan et al., 2015). It is possible that selection for traits that improve breath holding underwater increased Hb-O<sub>2</sub> affinity in these diving duck species, as observed in some other diving birds (Meir and Ponganis, 2009), such that they may have been “preadapted” to life at high-altitude. Then upon colonizing high altitude, these diving species may have since been constrained in increasing Hb-O<sub>2</sub> affinity any further, or there may have been weaker selective pressure for doing so. Nevertheless, in general, there is very strong evidence for convergent evolution of increased Hb-O<sub>2</sub> affinity in high-altitude taxa, making a strong case for the adaptive value of this trait for life in hypoxic environments (Storz, 2016b). However, the

physiological implications of this evolved trait for SaO<sub>2</sub> and respiratory gas exchange have seldom been examined in high-altitude natives.

### **Improvements in arterial O<sub>2</sub> saturation in hypoxia are only present in high-altitude taxa with concurrent increases in both ventilation and haemoglobin-O<sub>2</sub> affinity**

Our current findings suggest that the relative advantage of increasing Hb-O<sub>2</sub> affinity for improving arterial O<sub>2</sub> saturation is contingent upon the relative levels of ventilation. Of the three species of high-altitude ducks that have evolved an increased Hb-O<sub>2</sub> affinity that we examined (yellow-billed pintail, cinnamon teal, speckled teal), only one – the yellow-billed pintail – maintained higher SaO<sub>2</sub> in hypoxia than their close relative from low altitude, and only in moderate hypoxia (Fig. 5). The yellow-billed pintail was also the only one of this group of high-altitude ducks in which  $\dot{V}_E$  was elevated compared to its low-altitude counterpart during hypoxia. The other two high-altitude ducks that have evolved higher Hb-O<sub>2</sub> affinities – cinnamon teal and speckled teal – had similar or lower  $\dot{V}_E$  as compared to their close low-altitude relatives and SaO<sub>2</sub> in hypoxia was not enhanced. In high-altitude torrent duck, where  $\dot{V}_E$  was higher but Hb-O<sub>2</sub> affinity was similar to its low-altitude relative, SaO<sub>2</sub> in hypoxia was also not enhanced. These findings suggest that evolved increases in Hb-O<sub>2</sub> affinity may only be expected to improve SaO<sub>2</sub> in high-altitude taxa that also exhibit higher  $\dot{V}_E$  than their low-altitude relatives. Therefore, interactions between multiple respiratory traits in the O<sub>2</sub> transport cascade affect the integrated systems-level function of animals native to high altitude.

### **COMPETING INTERESTS**

The authors declare no competing or financial interests.

### **FUNDING**

This research was supported by funds from the Natural Sciences and Engineering Research Council of Canada (NSERC) Discovery Grants to G.R.S and W.K.M. and by a National Science Foundation grant (IOS-0949439) and the James A. Kushlan Endowment for Waterbird Biology and Conservation to K.G.M.

## LIST OF ABBREVIATIONS

ACR – air convection requirement

BTPS – body temperature pressure, saturated

$f_R$  – breathing frequency

Hb-O<sub>2</sub> – haemoglobin-oxygen

HVR – hypoxic ventilatory response

$M_b$  – body mass

PaO<sub>2</sub> – arterial partial pressure of oxygen

PCO<sub>2</sub> – partial pressure of carbon dioxide

PO<sub>2</sub> – partial pressure of oxygen

SaO<sub>2</sub> – arterial oxygen saturation

STPD – standard temperature and pressure, dried

$T_b$  – body temperature

VAH – ventilatory acclimatization to hypoxia

$\dot{V}_E$  – total ventilation

$\dot{V}O_2$  – oxygen consumption rate

$V_T$  – tidal volume

## REFERENCES

- Barros, R. C. H., Branco, L. G. S. and Cárnio, E. C.** (2006). Respiratory and body temperature modulation by adenosine A1 receptors in the anteroventral preoptic region during normoxia and hypoxia. *Respir. Physiol. Neurobiol.* **153**, 115–125.
- Beall, C. M.** (2000). Tibetan and Andean contrasts in adaptation to high-altitude hypoxia. *Adv. Exp. Med. Biol.* **475**, 63–74.
- Beall, C. M., Strohl, K. P., Blangero, J., Williams-Blangero, S., Almasy, L. A., Decker, M. J., Worthman, C. M., Goldstein, M. C., Vargas, E., Villena, M., et al.** (1997). Ventilation and hypoxic ventilatory response of Tibetan and Aymara high altitude natives. *Am. J. Phys. Anthropol.* **104**, 427–447.
- Birchard, G. F. and Tenney, S. M.** (1986). The hypoxic ventilatory response of rats with increased blood oxygen affinity. *Respir. Physiol.* **66**, 225–233.
- Black, C. P. and Tenney, S. M.** (1980). Oxygen transport during progressive hypoxia in high-altitude and sea-level waterfowl. *Respir. Physiol.* **39**, 217–239.
- Brutsaert, T. D.** (2007). Population genetic aspects and phenotypic plasticity of ventilatory responses in high altitude natives. *Respir. Physiol. Neurobiol.* **158**, 151–160.
- Brutsaert, T.** (2016). Why are high altitude natives so strong at high altitude? Nature vs. nurture: Genetic factors vs. growth and development. *Adv. Exp. Med. Biol.* **903**, 101–112.
- Brutsaert, T. D., Parra, E. J., Shriver, M. D., Gamboa, A., Rivera-Ch, M. and León-Velarde, F.** (2005). Ancestry explains the blunted ventilatory response to sustained hypoxia and lower exercise ventilation of Quechua altitude natives. *Am. J. Physiol. Integr. Comp. Physiol.* **289**, R225–R234.
- Bulgarella, M., Sorenson, M. D., Peters, J. L., Wilson, R. E. and McCracken, K. G.** (2010). Phylogenetic relationships of Amazonetta, Speculanas, Lophonetta, and Tachyeres: Four morphologically divergent duck genera endemic to South America. *J. Avian Biol.* **41**, 186–199.
- Chappell, M. A.** (1992). Ventilatory accommodation of changing oxygen demand in sciurid rodents. *J. Comp. Physiol. B* **162**, 722–730.
- Conover, D. O. and Schultz, E. T.** (1995). Phenotypic similarity and the evolutionary significance of countergradient variation. *Trends Ecol. Evol.* **10**, 248–252.
- Eldridge, F. L.** (1994). Central integration of mechanisms in exercise hyperpnea. *Med. Sci. Sports Exerc.* **26**, 319–327.
- Gonzalez, C., Almaraz, L., Obeso, A. and Rigual, R.** (1994). Carotid body chemoreceptors: from natural stimuli to sensory discharges. *Physiol Rev* **74**, 829–898.
- Gonzalez, J., Düttmann, H. and Wink, M.** (2009). Phylogenetic relationships based on two mitochondrial genes and hybridization patterns in Anatidae. *J. Zool.* **279**, 310–318.
- Ivy, C. M., York, J. M., Lague, S. L., Chua, B. A., Alza, L., McCracken, K. G., Milsom, W. K. and Scott, G. R.** (2018). Validation of a pulse oximetry system for high-altitude

waterfowl by examining the hypoxia responses of the Andean goose (*Chloephaga melanoptera*). *Physiol. Biochem. Zool.* **91**, 859–867.

- Johnson, K. P., Sorenson, M. D. and Arbor, A.** (1999). Phylogeny and Biogeography of Dabbling Ducks (Genus: *Anas*): A comparison of molecular and morphological evidence. *Auk* 792–805.
- Kilgore, D. L., Boggs, D. F., Kilgore, T. J., Colby, C., Williams, B. R. and Bavis, R. W.** (2008). Ventilatory and metabolic responses of burrowing owls, *Athene cunicularia*, to moderate and extreme hypoxia: Analysis of the hypoxic ventilatory threshold vs. hemoglobin oxygen affinity relationship in birds. *Comp. Biochem. Physiol. - A Mol. Integr. Physiol.* **150**, 247–257.
- Lague, S. L., Chua, B., Farrell, A. P., Wang, Y. and Milsom, W. K.** (2016). Altitude matters: differences in cardiovascular and respiratory responses to hypoxia in bar-headed geese reared at high and low altitudes. *J. Exp. Biol.* **219**, 1974–1984.
- Lague, S. L., Chua, B., Alza, L., Scott, G. R., Frappell, P. B., Zhong, Y., Farrell, A. P., McCracken, K. G., Wang, Y. and Milsom, W. K.** (2017). Divergent respiratory and cardiovascular responses to hypoxia in bar-headed geese and Andean birds. *J. Exp. Biol.* **220**, 4186–4194.
- Laguë, S. L.** (2017). High-altitude champions: birds that live and migrate at altitude. *J. Appl. Physiol.* **123**, 942–950.
- Maina, J. N., McCracken, K. G., Chua, B., York, J. M. and Milsom, W. K.** (2017). Morphological and morphometric specializations of the lung of the Andean goose, *Chloephaga melanoptera*: A lifelong high-altitude resident. *PLoS One* **12**, e0174395.
- McCracken, K. G., Barger, C. P., Bulgarella, M., Johnson, K. P., Sonsthagen, S. A., Trucco, J., Valqui, T. H., Wilson, R. E., Winker, K. and Sorenson, M. D.** (2009a). Parallel evolution in the major haemoglobin genes of eight species of Andean waterfowl. *Mol. Ecol.* **18**, 3992–4005.
- McCracken, K. G., Kuhner, M. K., Barger, C. P., Johnson, K. P., Moore, A. V., Peters, J. L., Valqui, T. H., Bulgarella, M., Wilson, R. E., Winker, K., et al.** (2009b). Signatures of High-Altitude Adaptation in the Major Hemoglobin of Five Species of Andean Dabbling Ducks. *Am. Nat.* **174**, 631–650.
- McCracken, K. G., Bulgarella, M., Johnson, K. P., Kuhner, M. K., Trucco, J., Valqui, T. H., Wilson, R. E. and Peters, J. L.** (2009c). Gene flow in the face of countervailing selection: Adaptation to high-altitude hypoxia in the  $\beta$ A hemoglobin subunit of yellow-billed pintails in the Andes. *Mol. Biol. Evol.* **26**, 815–827.
- Meir, J. U. and Ponganis, P. J.** (2009). High-affinity hemoglobin and blood oxygen saturation in diving emperor penguins. *J. Exp. Biol.* **212**, 3330–3338.
- Monge, C. and Leon-Velarde, F.** (1991). Physiological Adaptation to High Altitude : Oxygen Transport in Mammals and Birds. *Physiol. Rev.* **71**, 1135–1172.
- Moore, L. G.** (2000). Comparative human ventilatory adaptation to high altitude. *Respir. Physiol.* **121**, 257–276.



- Moore, L. G.** (2017). Measuring high-altitude adaptation. *J. Appl. Physiol.* **123**, 1371–1385.
- Natarajan, C., Projecto-Garcia, J., Moriyama, H., Weber, R. E., Muñoz-Fuentes, V., Green, A. J., Kopuchian, C., Tubaro, P. L., Alza, L., Bulgarella, M., et al.** (2015). Convergent Evolution of Hemoglobin Function in High-Altitude Andean Waterfowl Involves Limited Parallelism at the Molecular Sequence Level. *PLoS Genet.* **11**, 1–25.
- Novoa, F. F., Rosenmann, M. and Bozinovic, F.** (1991). Physiological responses of four passerine species to simulated altitudes. *Comp. Biochem. Physiol. -- Part A Physiol.* **99A**, 179–183.
- Pichon, A., Zhenzhong, B., Favret, F., Jin, G., Shufeng, H., Marchant, D., Richalet, J.-P. and Ge, R.-L.** (2009). Long-term ventilatory adaptation and ventilatory response to hypoxia in plateau pika (*Ochotona curzoniae*): role of nNOS and dopamine. *Am. J. Physiol. Regul. Integr. Comp. Physiol.* **297**, R978–R987.
- Powell, F. L.** (2007). The influence of chronic hypoxia upon chemoreception. *Respir. Physiol. Neurobiol.* **157**, 154–161.
- Powell, F. L., Milsom, W. K. and Mitchell, G. S.** (1998). Time domains of the hypoxic ventilatory response. *Respir. Physiol.* **112**, 123–134.
- Powell, F. L., Shams, H., Hempleman, S. C. and Mitchell, G. S.** (2004). Breathing in thin air: Acclimatization to altitude in ducks. *Respir. Physiol. Neurobiol.* **144**, 225–235.
- Schwenke, D. O., Bolter, C. P. and Cragg, P. A.** (2007). Are the carotid bodies of the guinea-pig functional? *Comp. Biochem. Physiol. Part A Mol. Integr. Physiol.* **146**, 180–188.
- Scott, G. R. and Milsom, W. K.** (2007). Control of breathing and adaptation to high altitude in the bar-headed goose. *AJP Regul. Integr. Comp. Physiol.* **293**, R379–R391.
- Scott, G. R., Cadena, V., Tattersall, G. J. and Milsom, W. K.** (2008). Body temperature depression and peripheral heat loss accompany the metabolic and ventilatory responses to hypoxia in low and high altitude birds. *J. Exp. Biol.* **211**, 1326–1335.
- Storz, J. F.** (2016a). Gene Duplication and Evolutionary Innovations in Hemoglobin-Oxygen Transport. *Physiology* **31**, 223–232.
- Storz, J. F.** (2016b). Hemoglobin–oxygen affinity in high-altitude vertebrates: is there evidence for an adaptive trend? *J. Exp. Biol.* **219**, 3190–3203.
- Storz, J. F., Scott, G. R. and Cheviron, Z. A.** (2010). Phenotypic plasticity and genetic adaptation to high-altitude hypoxia in vertebrates. *J. Exp. Biol.* **213**, 4125–4136.
- White, C. R., Phillips, N. F. and Seymour, R. S.** (2006). The scaling and temperature dependence of vertebrate metabolism. *Biol. Lett.* **2**, 125–127.
- York, J. M., Chua, B. A., Ivy, C. M., Alza, L., Cheek, R., Scott, G. R., McCracken, K. G., Frappell, P. B., Dawson, N. J., Laguë, S. L., et al.** (2017). Respiratory mechanics of eleven avian species resident at high and low altitude. *J. Exp. Biol.* **220**, 1079–1089.

## Figures

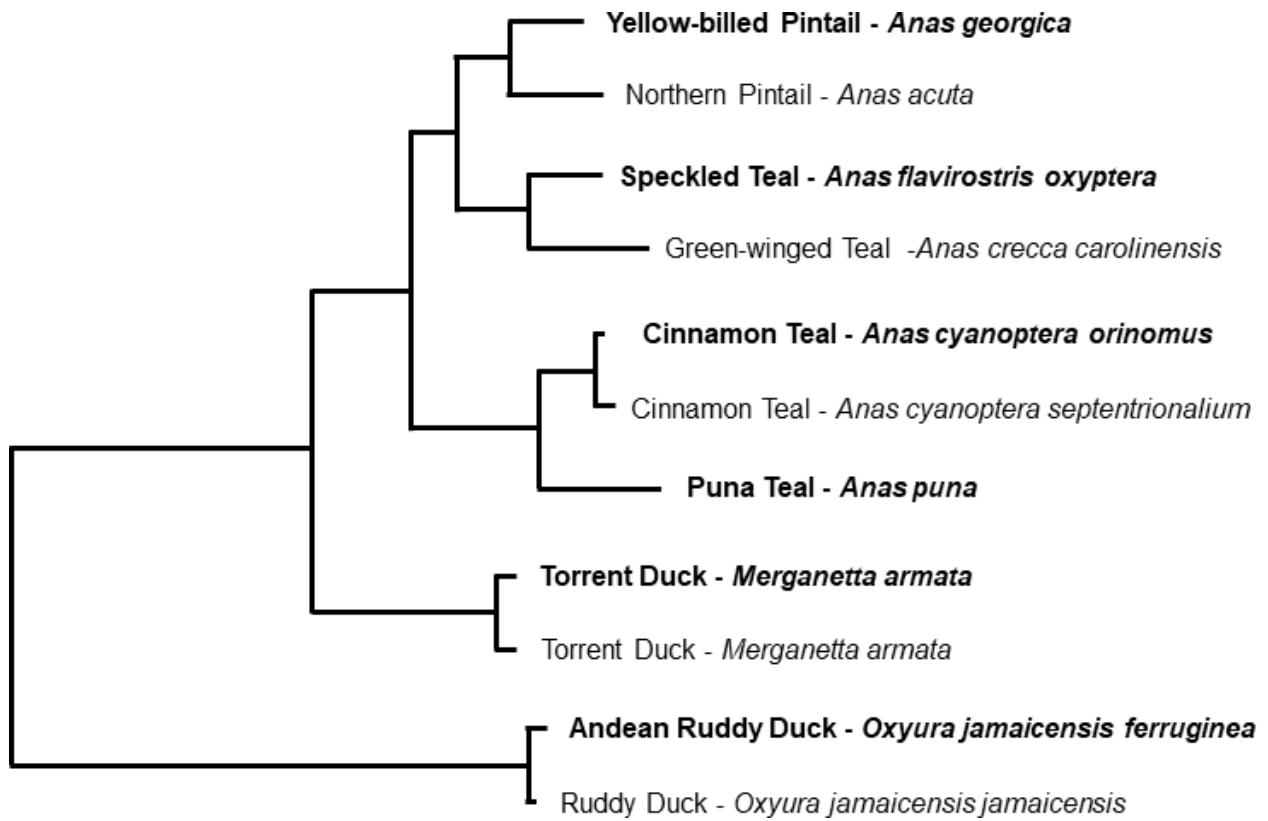

Figure 1. Phylogeny of duck species compared in this study. Bolded names denote high-altitude species. Adapted from (Bulgarella et al., 2010; Gonzalez et al., 2009; Johnson et al., 1999).

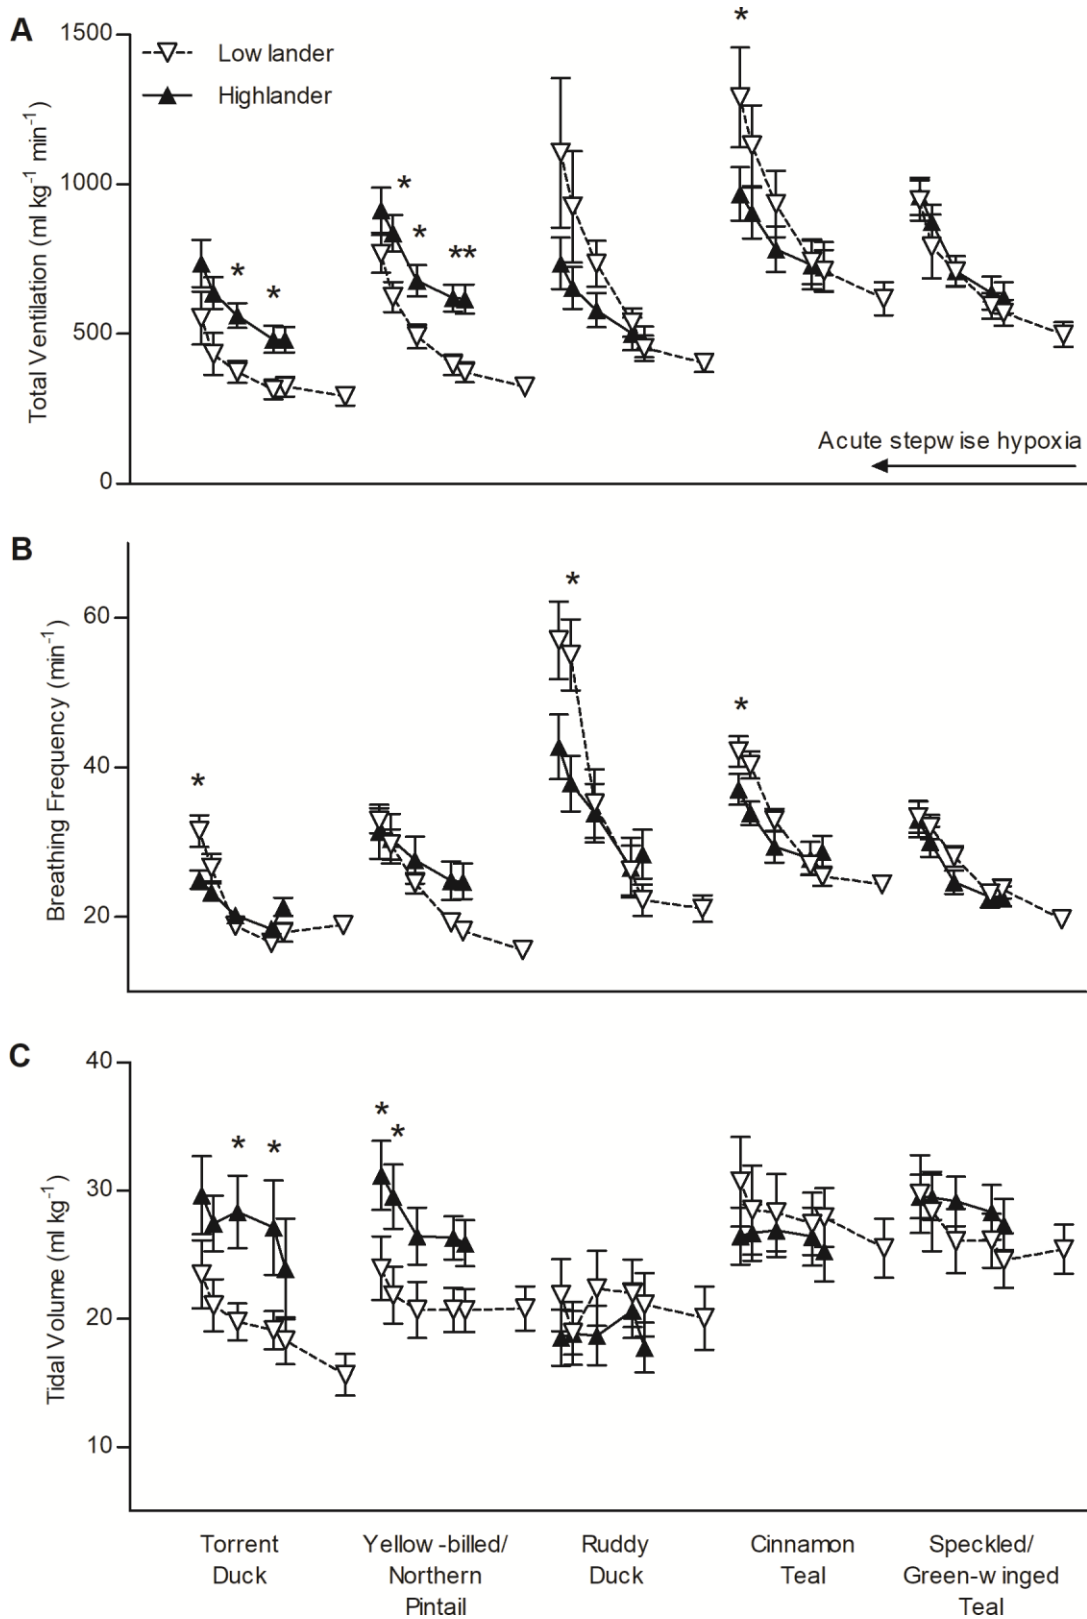

Figure 2. Total ventilation (A), breathing frequency (B), and tidal volume (C) during hypoxia for high-altitude populations of several duck species, compared to low-altitude populations of the same species or to low-altitude congeners. Responses to acute hypoxia for each high-low pair are shown from right to left for stepwise reductions in inspired O<sub>2</sub> tension (PO<sub>2</sub>): 18 (lowlanders only), 13, 12, 9, 7, and 6 kPa O<sub>2</sub>. \* represents a significant pairwise difference between highlanders and lowlanders within an inspired PO<sub>2</sub> using Holm-Sidak post-tests. n = 14 low-altitude torrent ducks, n = 8 high-altitude torrent ducks, n = 10 low-altitude northern pintails, n = 13 high-altitude yellow-billed pintails, n = 8 low-altitude ruddy ducks, n = 12 high-altitude ruddy ducks, n = 11 low-altitude cinnamon teal, n = 12 high-altitude cinnamon teal, n = 10 low-altitude green-winged teal, n = 12 high-altitude speckled teal.

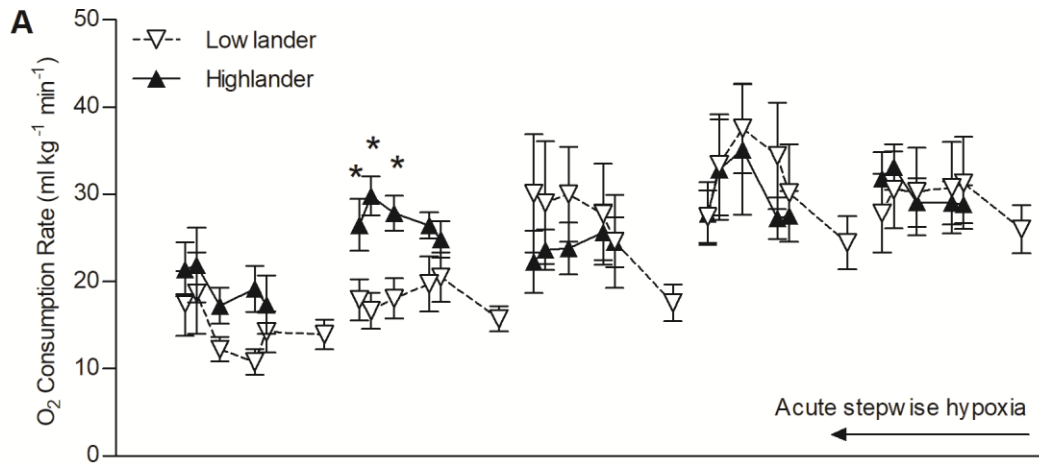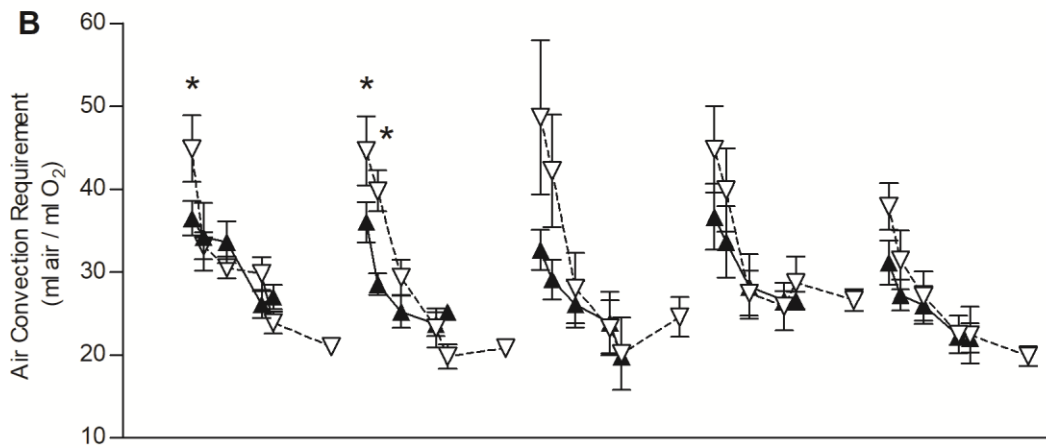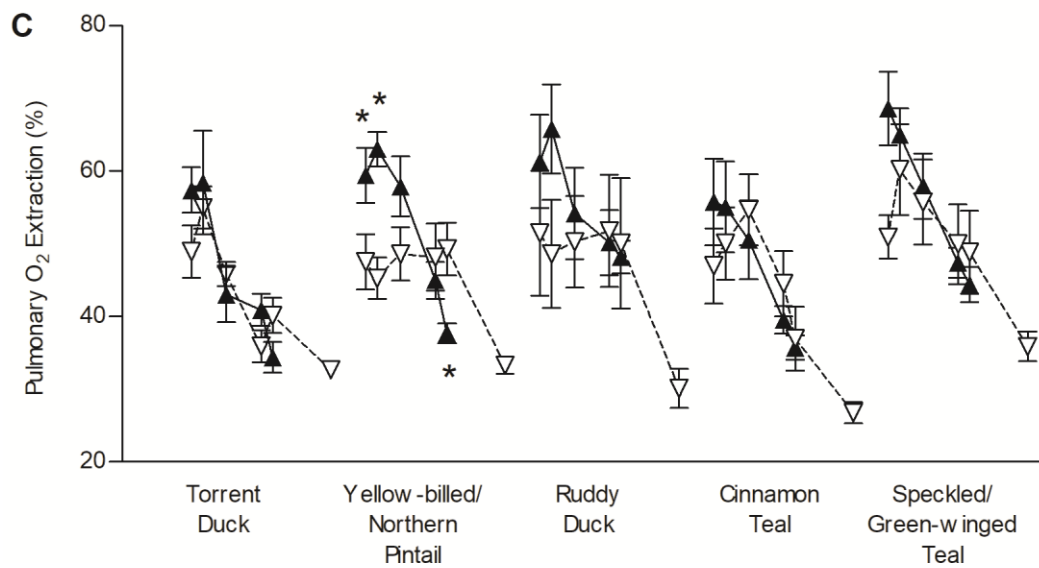

Figure 3. (A) Rate of O<sub>2</sub> consumption, (B) air convection requirement, and (C) pulmonary O<sub>2</sub> extraction during hypoxia for high-altitude populations of several duck species, compared to low-altitude populations of the same species or to lowland congeners. Responses to acute hypoxia for each high-low pair are shown from right to left for stepwise reductions in inspired O<sub>2</sub> tension (PO<sub>2</sub>): 18 (lowlanders only), 13, 12, 9, 7, and 6 kPa O<sub>2</sub>. \* represents a significant pairwise difference between high and low altitude within an inspired PO<sub>2</sub> using Holm-Sidak post-tests. N as for Figure 2.

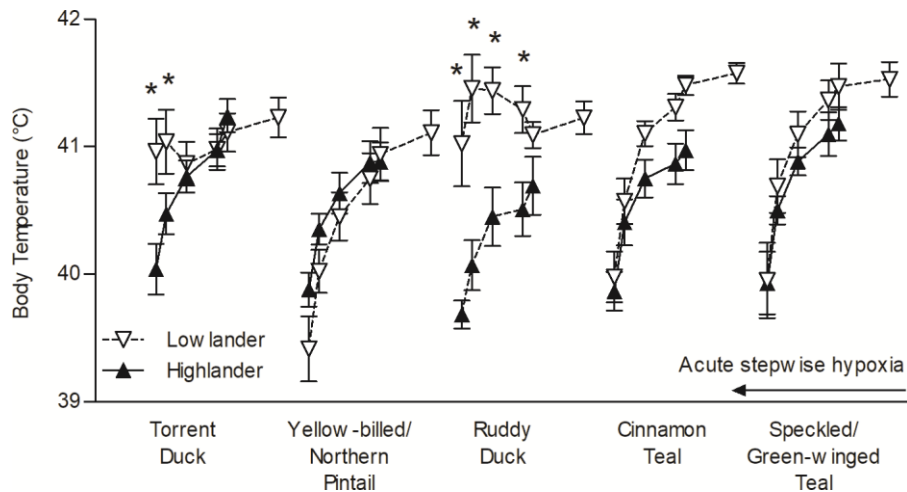

Figure 4. Body temperature during hypoxia for high-altitude populations of several duck species, compared to low-altitude populations of the same species or to lowland congeners. Responses to acute hypoxia for each high-low pair are shown from right to left for stepwise reductions in inspired O<sub>2</sub> tension (PO<sub>2</sub>): 18 (lowlanders only), 13, 12, 9, 7, and 6 kPa O<sub>2</sub>. \* represents a significant pairwise difference between high and low altitude within an inspired PO<sub>2</sub> using Holm-Sidak post-tests. N as for Figure 2.

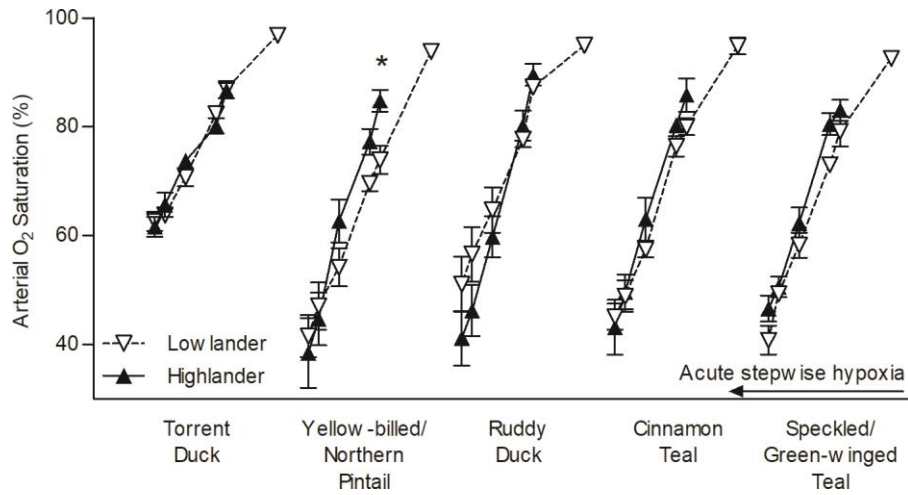

Figure 5. Arterial O<sub>2</sub> saturation during hypoxia for high-altitude populations of several duck species, compared to low-altitude populations of the same species or to lowland congeners. Responses to acute hypoxia for each high-low pair are shown from right to left for stepwise reductions in inspired O<sub>2</sub> tension (PO<sub>2</sub>): 18 (lowlanders only), 13, 12, 9, 7, and 6 kPa O<sub>2</sub>. \* represents a significant pairwise difference between highlanders and lowlanders within an inspired PO<sub>2</sub> using Holm-Sidak post-tests. N = 10 low-altitude torrent ducks, n = 9 high-altitude torrent ducks, n = 10 low-altitude northern pintails, n = 6 high-altitude yellow-billed pintails, n = 8 low-altitude ruddy ducks, n = 7 high-altitude ruddy ducks, n = 10 low-altitude cinnamon teal, n = 5 high-altitude cinnamon teal, n = 9 low-altitude green-winged teal, n = 6 high-altitude speckled teal.



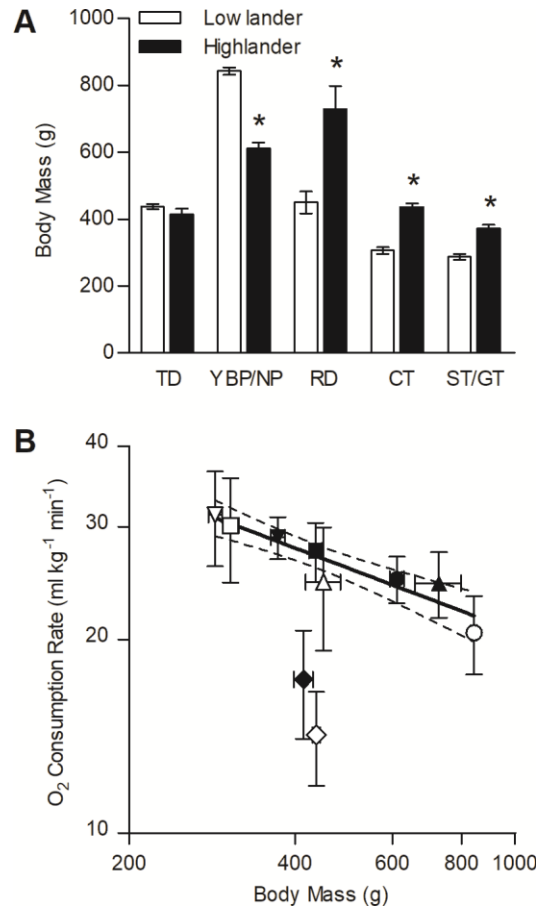

Figure 6. Body mass ( $M_b$ ) and its relationship to  $\dot{V}O_2$  across high-altitude and low-altitude ducks. (A) There were significant main effects of species pair ( $F_{4,100}=71.857$ ,  $P<0.001$ ) and altitude ( $F_{1,100}=7.171$ ,  $P=0.009$ ) on  $M_b$  in two-factor ANOVA. \* represents a significant pairwise difference between highlanders and lowlanders within a high-low pair. N as in Figure 2. (B) There was a strong allometric relationship between  $\dot{V}O_2$  (measured at 13 kPa for all taxa) and  $M_b$  (both shown on a log scale) across taxa when torrent ducks were excluded ( $\dot{V}O_2 = 195 M_b^{-0.33}$ ; black line, with dotted lines representing 95% confidence intervals of the regression). Data points are mean  $\pm$  S.E.M. and symbols are as follows: black, highland taxon; white, lowland taxon; diamonds, torrent ducks (TD); circles, yellow-billed pintail (YBP) or northern pintail (NP); upwards triangles, ruddy ducks (RD); squares, cinnamon teal (CT); downwards triangles, speckled teal (ST) or green-winged teal (GT).

**Table 1. Statistical results of two-way ANOVA of acute hypoxia responses**

|                                     | Highland species      | Population effect |              | Inspired PO <sub>2</sub> effect |                  | Interaction |                  |
|-------------------------------------|-----------------------|-------------------|--------------|---------------------------------|------------------|-------------|------------------|
|                                     |                       | F-value           | P-value      | F-value                         | P-value          | F-value     | P-value          |
| Total ventilation                   | Torrent duck          | 2.725             | 0.115        | 44.79                           | <b>&lt;0.001</b> | 3.213       | <b>0.017</b>     |
|                                     | Yellow-billed pintail | 8.237             | <b>0.009</b> | 77.76                           | <b>&lt;0.001</b> | 1.268       | 0.289            |
|                                     | Ruddy duck            | 4.004             | 0.060        | 40.96                           | <b>&lt;0.001</b> | 11.38       | <b>&lt;0.001</b> |
|                                     | Cinnamon teal         | 1.116             | 0.303        | 38.58                           | <b>&lt;0.001</b> | 6.130       | <b>&lt;0.001</b> |
|                                     | Speckled teal         | 0.026             | 0.874        | 60.75                           | <b>&lt;0.001</b> | 0.369       | 0.830            |
| Breathing frequency                 | Torrent duck          | 0.208             | 0.653        | 35.35                           | <b>&lt;0.001</b> | 7.431       | <b>&lt;0.001</b> |
|                                     | Yellow-billed pintail | 0.687             | 0.417        | 58.50                           | <b>&lt;0.001</b> | 7.400       | <b>&lt;0.001</b> |
|                                     | Ruddy duck            | 0.792             | 0.385        | 55.51                           | <b>&lt;0.001</b> | 10.33       | <b>&lt;0.001</b> |
|                                     | Cinnamon teal         | 0.975             | 0.335        | 49.85                           | <b>&lt;0.001</b> | 6.626       | <b>&lt;0.001</b> |
|                                     | Speckled teal         | 0.577             | 0.457        | 25.96                           | <b>&lt;0.001</b> | 0.456       | 0.767            |
| Tidal volume                        | Torrent duck          | 5.236             | <b>0.034</b> | 9.891                           | <b>&lt;0.001</b> | 1.489       | 0.214            |
|                                     | Yellow-billed pintail | 4.495             | <b>0.046</b> | 12.55                           | <b>&lt;0.001</b> | 1.077       | 0.373            |
|                                     | Ruddy duck            | 0.982             | 0.335        | 1.466                           | 0.222            | 1.099       | 0.364            |
|                                     | Cinnamon teal         | 0.388             | 0.540        | 1.724                           | 0.152            | 1.218       | 0.309            |
|                                     | Speckled teal         | 0.316             | 0.581        | 7.597                           | <b>&lt;0.001</b> | 1.766       | 0.145            |
| O <sub>2</sub> consumption rate     | Torrent duck          | 1.745             | 0.206        | 4.876                           | <b>0.002</b>     | 0.754       | 0.559            |
|                                     | Yellow-billed pintail | 8.993             | <b>0.007</b> | 0.363                           | 0.834            | 3.605       | <b>0.009</b>     |
|                                     | Ruddy duck            | 2.144             | 0.160        | 0.656                           | 0.625            | 1.571       | 0.192            |
|                                     | Cinnamon teal         | 0.224             | 0.641        | 1.864                           | 0.124            | 0.347       | 0.846            |
|                                     | Speckled teal         | 0.017             | 0.897        | 0.246                           | 0.911            | 0.723       | 0.579            |
| Air convection requirement          | Torrent duck          | 0.216             | 0.649        | 14.58                           | <b>&lt;0.001</b> | 3.508       | <b>0.012</b>     |
|                                     | Yellow-billed pintail | 2.776             | 0.110        | 41.55                           | <b>&lt;0.001</b> | 8.564       | <b>&lt;0.001</b> |
|                                     | Ruddy duck            | 0.061             | 0.807        | 2.494                           | 0.051            | 0.410       | 0.801            |
|                                     | Cinnamon teal         | 1.052             | 0.317        | 10.317                          | <b>&lt;0.001</b> | 1.158       | 0.335            |
|                                     | Speckled teal         | 1.184             | 0.291        | 9.400                           | <b>&lt;0.001</b> | 0.776       | 0.544            |
| Pulmonary O <sub>2</sub> extraction | Torrent duck          | 0.309             | 0.586        | 17.23                           | <b>&lt;0.001</b> | 2.295       | 0.070            |
|                                     | Yellow-billed pintail | 1.807             | 0.193        | 7.701                           | <b>&lt;0.001</b> | 11.48       | <b>&lt;0.001</b> |
|                                     | Ruddy duck            | 0.052             | 0.822        | 1.438                           | 0.231            | 0.792       | 0.534            |
|                                     | Cinnamon teal         | 0.025             | 0.877        | 8.224                           | <b>&lt;0.001</b> | 1.395       | 0.243            |
|                                     | Speckled teal         | 0.515             | 0.482        | 4.873                           | <b>0.002</b>     | 2.058       | 0.096            |
| Body temperature                    | Torrent duck          | 1.312             | 0.266        | 10.77                           | <b>&lt;0.001</b> | 11.17       | <b>&lt;0.001</b> |
|                                     | Yellow-billed pintail | 0.882             | 0.358        | 81.51                           | <b>&lt;0.001</b> | 3.070       | <b>0.021</b>     |
|                                     | Ruddy duck            | 10.99             | <b>0.003</b> | 3.274                           | <b>0.016</b>     | 3.070       | <b>0.022</b>     |
|                                     | Cinnamon teal         | 3.240             | 0.086        | 60.99                           | <b>&lt;0.001</b> | 1.624       | 0.176            |
|                                     | Speckled teal         | 0.605             | 0.447        | 37.18                           | <b>&lt;0.001</b> | 3.16        | 0.867            |
| Arterial O <sub>2</sub> saturation  | Torrent duck          | 0.008             | 0.932        | 107.8                           | <b>&lt;0.001</b> | 1.361       | 0.256            |
|                                     | Yellow-billed pintail | 1.237             | 0.285        | 66.89                           | <b>&lt;0.001</b> | 2.485       | 0.054            |
|                                     | Ruddy duck            | 0.399             | 0.547        | 45.33                           | <b>&lt;0.001</b> | 1.133       | 0.361            |
|                                     | Cinnamon teal         | 2.071             | 0.174        | 85.79                           | <b>&lt;0.001</b> | 0.812       | 0.523            |
|                                     | Speckled teal         | 3.795             | 0.073        | 102.2                           | <b>&lt;0.001</b> | 1.032       | 0.402            |

See text for the low-altitude population/species that were compared to each high-altitude species.

Significant values are bolded.

**Table 2. Hypoxia responses of the high-altitude puna teal**

|                                                                          | Inspired PO <sub>2</sub> (kPa) |              |               |               |               | Main effect of inspired PO <sub>2</sub> |                  |
|--------------------------------------------------------------------------|--------------------------------|--------------|---------------|---------------|---------------|-----------------------------------------|------------------|
|                                                                          | 13                             | 12           | 9             | 7             | 6             | F-value                                 | P-value          |
| Total ventilation (ml kg <sup>-1</sup> min <sup>-1</sup> )               | 651.5 ± 54.8                   | 655.6 ± 54.4 | 743.7 ± 64.4* | 830.7 ± 60.7* | 903.6 ± 62.6* | 59.83                                   | <b>&lt;0.001</b> |
| Breathing frequency (min <sup>-1</sup> )                                 | 22.96 ± 1.54                   | 21.65 ± 1.37 | 22.10 ± 1.50  | 23.19 ± 1.55  | 24.48 ± 1.59  | 4.296                                   | <b>0.005</b>     |
| Tidal volume (ml kg <sup>-1</sup> )                                      | 28.88 ± 2.29                   | 30.87 ± 2.47 | 34.16 ± 2.55* | 36.80 ± 2.75* | 38.03 ± 2.88* | 41.93                                   | <b>&lt;0.001</b> |
| O <sub>2</sub> consumption rate (ml kg <sup>-1</sup> min <sup>-1</sup> ) | 26.95 ± 1.79                   | 25.08 ± 2.75 | 28.77 ± 4.00  | 24.43 ± 3.12  | 22.78 ± 2.71  | 1.695                                   | 0.168            |
| Air convection requirement (ml air ml <sup>-1</sup> O <sub>2</sub> )     | 12.34 ± 0.37                   | 14.61 ± 1.49 | 15.01 ± 1.44  | 19.55 ± 1.67* | 22.89 ± 2.35* | 8.894                                   | <b>&lt;0.001</b> |
| Pulmonary O <sub>2</sub> extraction (%)                                  | 39.23 ± 1.25                   | 40.09 ± 3.56 | 51.55 ± 4.23  | 50.92 ± 4.93  | 51.28 ± 5.06  | 3.356                                   | <b>0.018</b>     |
| Body temperature (°C)                                                    | 40.59 ± 0.14                   | 40.45 ± 0.13 | 40.24 ± 0.09* | 39.92 ± 0.09* | 39.50 ± 0.10* | 72.07                                   | <b>&lt;0.001</b> |
| Arterial O <sub>2</sub> saturation (%)                                   | 83.23 ± 0.86                   | 77.44 ± 0.53 | 61.97 ± 3.28* | 43.93 ± 5.17* | 40.01 ± 5.21* | 57.26                                   | <b>&lt;0.001</b> |

PO<sub>2</sub>, partial pressure of O<sub>2</sub>; values are mean ± SEM, \* represents a significant difference compared to 13 kPa O<sub>2</sub>
